# Supplementary material
Source: MDPI journal article supplement (https://www.mdpi.com/2071-1050/10/2/357)
Supplement: s1 [file s1]

## Supplementary materials

**Table S1.** Output-to-primary-input multipliers of air transport sector and Output changes due to flight delays of 139 sectors in 2013.

| Sector                                                                         | Output-to-Primary-Input Multiplier | Output Changes (¥ Billions) | Sector                                                                           | Output-to-Primary-Input Multiplier | Output Changes (¥ Billions) |
|--------------------------------------------------------------------------------|------------------------------------|-----------------------------|----------------------------------------------------------------------------------|------------------------------------|-----------------------------|
| Air Transport                                                                  | 1.162677                           | 108.559171                  | Mining of Ferrous Metal Ores                                                     | 0.009038                           | 0.843849                    |
| Public Management and Social Organization                                      | 0.187550                           | 17.511540                   | Manufacture of Boiler and Prime Mover                                            | 0.008832                           | 0.824631                    |
| Business Services                                                              | 0.145986                           | 13.630672                   | Manufacture of Other Electronic Equipment                                        | 0.008752                           | 0.817200                    |
| Construction of Buildings                                                      | 0.110532                           | 10.320347                   | Manufacture of Glass and Glass Products                                          | 0.008744                           | 0.816408                    |
| Wholesale and Retail Trade                                                     | 0.105680                           | 9.867306                    | Manufacture of Metalworking Machinery                                            | 0.008533                           | 0.796771                    |
| Monetary Intermediation and Other Financial Services                           | 0.097991                           | 9.149411                    | Manufacture of Boats and Ships and Floating Devices                              | 0.008376                           | 0.782067                    |
| Education                                                                      | 0.081432                           | 7.603338                    | Printing and Reproduction of Recording Media                                     | 0.008029                           | 0.749631                    |
| Manufacture of Electronic Components and Parts                                 | 0.066860                           | 6.242760                    | Manufacture of soft Drinks and Refined Tea Products                              | 0.007987                           | 0.745700                    |
| Processing of Steel Rolling Processing                                         | 0.053549                           | 4.999892                    | Extraction of Crude Petroleum and Natural Gas                                    | 0.007851                           | 0.733092                    |
| Manufacture of Motor Vehicles, Except Parts and Accessories for Motor Vehicles | 0.051522                           | 4.810614                    | Manufacture of Paints, Printing Inks, Pigments and Similar Products              | 0.007720                           | 0.720797                    |
| Production and Supply of Electricity and Steam                                 | 0.050237                           | 4.690627                    | Manufacture of Furniture                                                         | 0.007647                           | 0.714033                    |
| Professional Technique Services                                                | 0.050015                           | 4.669886                    | Manufacture of Fertilizers                                                       | 0.007582                           | 0.707936                    |
| Manufacture of Computer                                                        | 0.049889                           | 4.658131                    | Manufacture of Broadcasting, Television Equipment of Radar and Related Equipment | 0.007381                           | 0.689210                    |
| Civil Engineering                                                              | 0.049053                           | 4.580113                    | Slaughtering and Processing of Meat                                              | 0.007377                           | 0.688785                    |
| Real Estate                                                                    | 0.048383                           | 4.517542                    | Processing of Other Foods                                                        | 0.007221                           | 0.674218                    |
| Cargo Handling, Transport Agency                                               | 0.047992                           | 4.481000                    | Manufacture of Chemical Fibers                                                   | 0.007105                           | 0.663365                    |
| Manufacture of Parts and Accessories for Motor Vehicles                        | 0.047150                           | 4.402373                    | Manufacture of Footwear                                                          | 0.007080                           | 0.661076                    |
| Manufacture of Fabricated Metal Products, Except Machinery and Equipment       | 0.046323                           | 4.325213                    | Manufacture of Leather, Fur, Feather and Its Products                            | 0.006979                           | 0.651673                    |
| Transport Via Road                                                             | 0.044874                           | 4.189905                    | Manufacture of Other Electrical Machinery and Equipment                          | 0.006813                           | 0.636120                    |
| Manufacture of Communication Equipment                                         | 0.042042                           | 3.925483                    | Management of Public Facilities                                                  | 0.006356                           | 0.593501                    |
| Manufacture of Pharmaceutical Products                                         | 0.038026                           | 3.550506                    | Manufacture of Batteries                                                         | 0.006160                           | 0.575189                    |
| Manufacture of Other General-Purpose Machinery                                 | 0.034794                           | 3.248731                    | Manufacture of Prepared Animal Feeds                                             | 0.006020                           | 0.562102                    |
| Software and Information Technology Services                                   | 0.032748                           | 3.057638                    | Manufacture of Movie, office Machinery and Equipment, of Projector and Camera    | 0.005657                           | 0.528174                    |

|                                                                                                             |          |          |                                                                                   |          |          |
|-------------------------------------------------------------------------------------------------------------|----------|----------|-----------------------------------------------------------------------------------|----------|----------|
| HealthCare                                                                                                  | 0.032663 | 3.049743 | Renting and Leasing                                                               | 0.005647 | 0.527256 |
| Manufacture of Plastic Products                                                                             | 0.027214 | 2.540984 | Cultural, Art and Entertainment Activities                                        | 0.005613 | 0.524087 |
| Manufacture of Equipment for Power Transmission and Distribution and Control                                | 0.025763 | 2.405529 | Accommodation                                                                     | 0.005598 | 0.522685 |
| Manufacture of Other Special Purpose Machinery                                                              | 0.025360 | 2.367843 | Manufacture of Railway Transport Equipment                                        | 0.005590 | 0.521933 |
| Manufacture of Refined Petroleum Products, Processing of Nuclear Fuel                                       | 0.024946 | 2.329214 | Manufacture of Products of Graphite and Other Nonmetallic Minerals                | 0.005482 | 0.511852 |
| Spinning, Weaving and Finishing of Cotton and Chemical Fibers                                               | 0.024238 | 2.263110 | Manufacture of Alcohol and Alcoholic Beverages                                    | 0.005279 | 0.492874 |
| Manufacture and Casting of Non-Ferrous Metals and Related Alloys                                            | 0.023576 | 2.201306 | Manufacture of Machinery for Agriculture, Forestry, Animal Production and Fishery | 0.005136 | 0.479571 |
| Manufacture of Basic Chemicals                                                                              | 0.023083 | 2.155230 | Manufacture of Daily-use Chemical Products                                        | 0.005074 | 0.473723 |
| Manufacture of Textile Wearing Apparel                                                                      | 0.021873 | 2.042313 | Manufacture of Grain Mill Products                                                | 0.005064 | 0.472814 |
| Manufacture of Special Chemical Products                                                                    | 0.021573 | 2.014257 | Mining of Non-Ferrous Metal Ores                                                  | 0.005045 | 0.471037 |
| Manufacture of Machinery for Mining, Metallurgy and Construction                                            | 0.020905 | 1.951919 | Journalism and Publishing                                                         | 0.004833 | 0.451215 |
| Construction Installation Activities                                                                        | 0.020040 | 1.871111 | Mining and Quarrying of Nonmetallic Mineral                                       | 0.004708 | 0.439577 |
| Mining and Washing of Coal                                                                                  | 0.019872 | 1.855428 | Capital Market Services                                                           | 0.004643 | 0.433496 |
| Manufacture of Household Appliances                                                                         | 0.019394 | 1.810775 | Transport Via Railway                                                             | 0.004501 | 0.420214 |
| Post                                                                                                        | 0.019285 | 1.800674 | Manufacture of Tobacco Products                                                   | 0.004250 | 0.396860 |
| Farming                                                                                                     | 0.018696 | 1.745662 | Manufacture of Ceramic and Porcelain Products                                     | 0.004198 | 0.391956 |
| Research and Experimental Development                                                                       | 0.018627 | 1.739172 | Manufacture of Made up Textile Articles, Except Apparel                           | 0.004192 | 0.391383 |
| Telecommunication and Other Information Transmission Services                                               | 0.017738 | 1.656234 | Manufacture of Crude and Refined Oils from Vegetable                              | 0.004047 | 0.377831 |
| Manufacture of Wire, Cable, Optical Cable and Electrical Goods                                              | 0.017193 | 1.605280 | Support Services to Farming, Forestry, Animal Production and Fishery              | 0.003996 | 0.373104 |
| Storage                                                                                                     | 0.016862 | 1.574374 | Fishery                                                                           | 0.003977 | 0.371350 |
| Technique Promotion and Application Services                                                                | 0.016472 | 1.537983 | Manufacture of Coke Products                                                      | 0.003970 | 0.370701 |
| Processing of Non-Ferrous Metals Rolling                                                                    | 0.016159 | 1.508800 | Manufacture of Refractory Products                                                | 0.003752 | 0.350345 |
| Manufacture and Casting of Basic Iron and Steel                                                             | 0.016133 | 1.506338 | Processing of Aquatic Products                                                    | 0.003504 | 0.327170 |
| Manufacture of Stationeries, Musical Instruments, Products of Arts and Crafts, Sports Goods, Games and Toys | 0.015971 | 1.491213 | Sports Activities                                                                 | 0.003380 | 0.315578 |
| Repair of Motor Vehicles, Electronic Products and Households Goods and Other Services                       | 0.015937 | 1.488071 | Other Manufacture                                                                 | 0.003335 | 0.311343 |
| Manufacture of Measuring Instruments and Meters                                                             | 0.015876 | 1.482375 | Manufacture of Knitted and Crocheted Fabrics and Articles, Except Apparel         | 0.003250 | 0.303454 |

|                                                                                           |          |          |                                                                 |                 |               |
|-------------------------------------------------------------------------------------------|----------|----------|-----------------------------------------------------------------|-----------------|---------------|
| Manufacture of Synthetic Materials                                                        | 0.015071 | 1.407216 | Manufacture of Milk and Dairy Products                          | 0.003108        | 0.290177      |
| Processing of Timbers and Manufacture of Products of Wood, Bamboo, Rattan, Palm and Straw | 0.014434 | 1.347743 | Manufacture of Ferroalloy                                       | 0.002844        | 0.265552      |
| Manufacture of Paper and Paper Products                                                   | 0.014115 | 1.317873 | Management of Water Conservancy                                 | 0.002776        | 0.259157      |
| Manufacture of Brick, Stone and Other Building Materials                                  | 0.014057 | 1.312492 | Production and Distribution of Gas                              | 0.002706        | 0.252617      |
| Manufacture of Pump, Valve, Compressor and Similar Machinery                              | 0.013791 | 1.287644 | Transport Via Pipeline                                          | 0.002477        | 0.231280      |
| Construction Completion and Finishing, Other Construction Activities                      | 0.013345 | 1.246001 | Manufacture of Pesticides                                       | 0.002420        | 0.225916      |
| Services to Households                                                                    | 0.012696 | 1.185400 | Forestry                                                        | 0.002256        | 0.210602      |
| Manufacture of Audiovisual Apparatus                                                      | 0.012574 | 1.174037 | Spinning, Weaving and Finishing of Wool                         | 0.002142        | 0.200044      |
| Radio, Televisions, Movies and Audio-Video Recording Activities                           | 0.012452 | 1.162602 | Ecological Protection and Environmental Control                 | 0.002130        | 0.198921      |
| Food and Beverage Services                                                                | 0.011968 | 1.117412 | Manufacture of Flavoring and Ferment Products                   | 0.002088        | 0.195000      |
| Manufacture of Cement, Lime and Plaster                                                   | 0.011532 | 1.076765 | Production and Distribution of Water                            | 0.001947        | 0.181824      |
| Manufacture of Lifting and Hand ling Equipment                                            | 0.010939 | 1.021374 | Repair of Fabricated Metal Products, Machinery and Equipment    | 0.001890        | 0.176501      |
| Manufacture of Products of Plaster and Cement and Similar Products                        | 0.010405 | 0.971541 | Comprehensive Utilization of Waste Resources                    | 0.001779        | 0.166118      |
| Insurance                                                                                 | 0.010306 | 0.962313 | Manufacture of Convenience Food Products                        | 0.001767        | 0.164975      |
| Animal Production                                                                         | 0.010086 | 0.941744 | Amusement and Recreation Activities                             | 0.001757        | 0.164010      |
| Manufacture of Machinery for Chemical Industry, Timber and Nonmetal Processing            | 0.009728 | 0.908269 | Spinning, Weaving and Finishing of Bast and Silk Fibers         | 0.001708        | 0.159434      |
| Manufacture of Other Transport Equipment                                                  | 0.009590 | 0.895452 | Mining Support Activities and Other Mining and Quarrying n.e.c. | 0.001528        | 0.142679      |
| Manufacture of Other Food Products n.e.c.                                                 | 0.009451 | 0.882456 | Social Security                                                 | 0.001004        | 0.093786      |
| Water Transport                                                                           | 0.009446 | 0.881979 | Manufacture of Sugar                                            | 0.000666        | 0.062170      |
| Manufacture of Generators and Eclectic Motors                                             | 0.009382 | 0.875979 | Social Work Activities                                          | 0.000433        | 0.040466      |
| Manufacture of Rubber Products                                                            | 0.009282 | 0.866614 | <b>Total</b>                                                    | <b>3.756134</b> | <b>350.71</b> |
